# Supplementary material
Source: publisher site journal article supplement (https://www.dovepress.com/article/317067)
Supplement: Supplementary file 1 [file get_supplementary_file.php]

| **Characteristics** | **Total** | **Included participates** | **Excluded participates** | **p-value** |
| --- | --- | --- | --- | --- |
| **Unweighted N** | 20967 | 12398 | 8569 |  |
| **With age and sex information** | 20453 | 12398 | 8055 |  |
| Age (years) |  |  |  | 0.012 |
| 45-55 | 4128(20.2%) | 2562(20.7%) | 1566(19.4%) |  |
| 55-65 | 6540(32.0%) | 4004(32.3%) | 2536(31.5%) |  |
| ≥65 | 9785(47.8%) | 5832(47.0%) | 3953(49.1%) |  |
| Sex |  |  |  | <0.001 |
| Men | 9801(47.9%) | 5762(46.5%) | 4039(50.1%) |  |
| Women | 10652(52.1%) | 6636(53.5%) | 4016(49.9%) |
| Married (%) | 17824(87.1%) | 10837(87.4%) | 6987(86.7%) | 0.165 |
| **With anthropometric information** | 15702 | 12398 | 3304 |  |
| Obesity (%) | 5591(35.6%) | 4514(36.4%) | 1077(32.6%) | <0.001 |
| Low muscle strength (%) | 2858(18.2%) | 2125(17.1%) | 733(22.2%) | <0.001 |
